# Supplementary material for: Development and validation of a pediatric model predicting trauma-related mortality
Source: Springer Nature journal article supplement (doi:10.1186/s12887-023-04437-9), 2023-12-18
Supplement: MOESM4 [file 26542260]

## Variable Classification

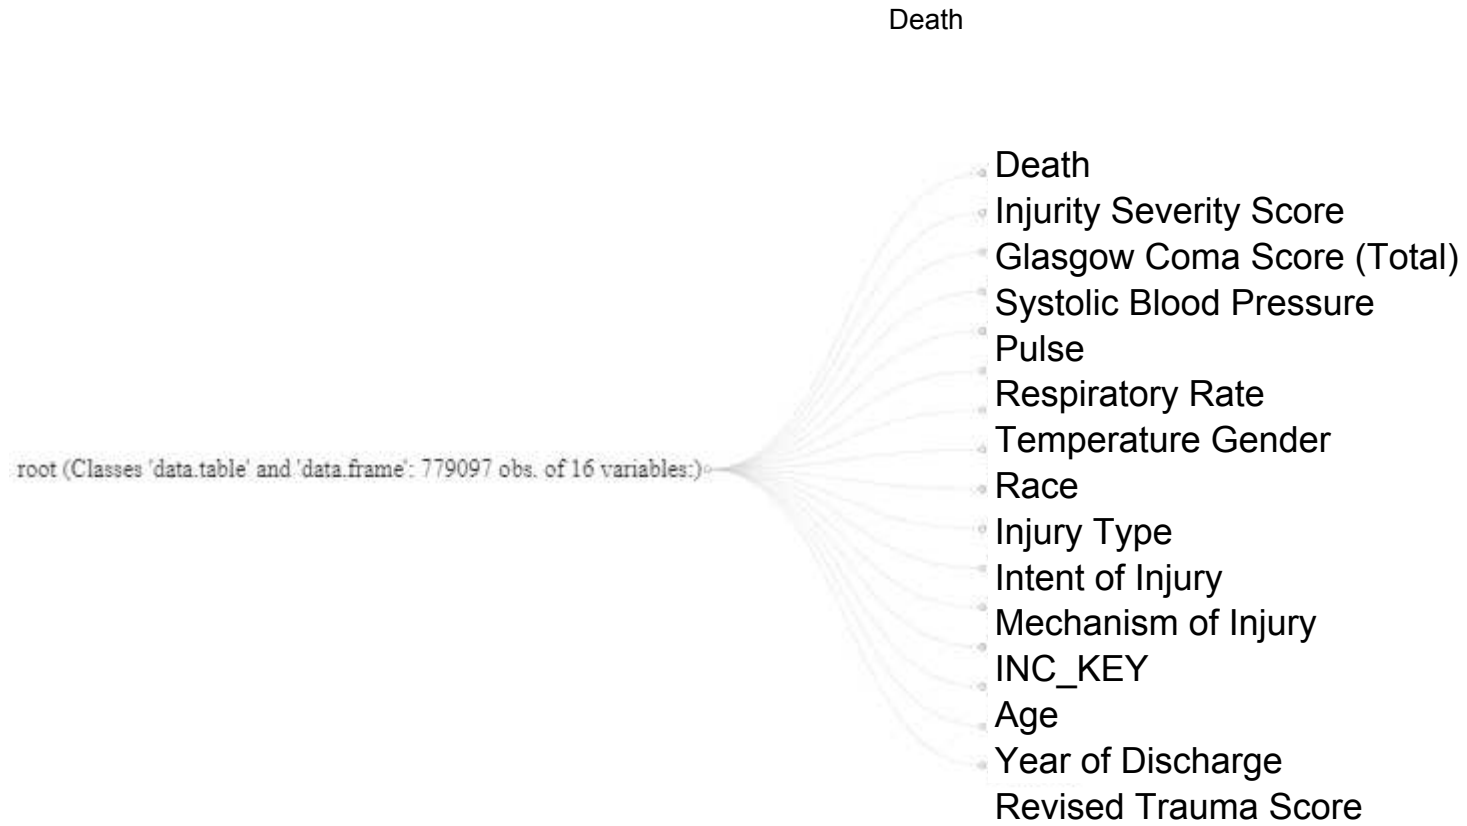

**Supplementary Figure 4a.** Classification of Variables as Factor, Integer (Int), or Numerical (Num)

# Missing Data Profile

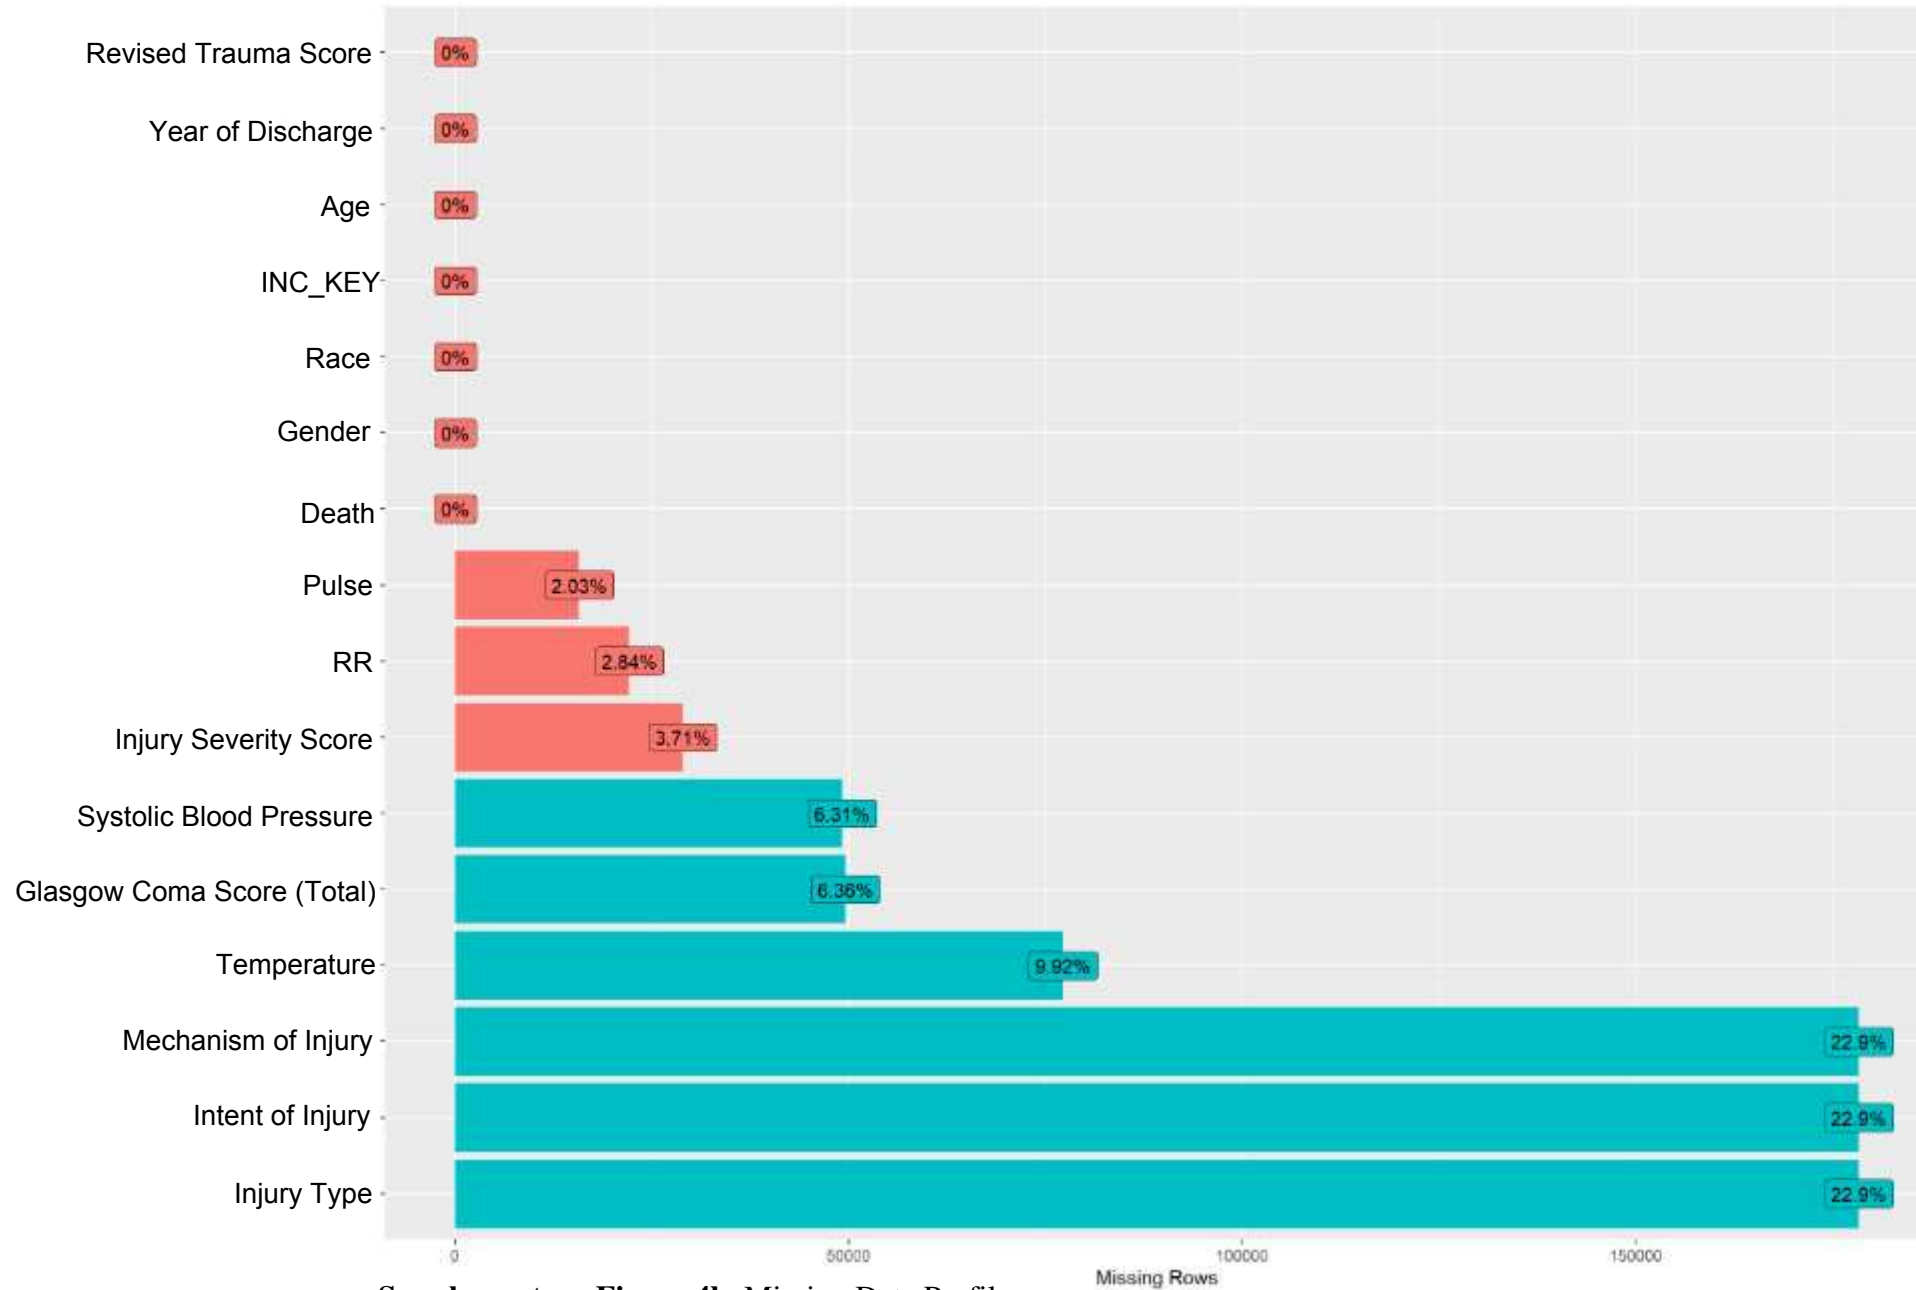

Supplementary Figure 4b. Missing Data Profile
