# Supplementary material for: Development and validation of a pediatric model predicting trauma-related mortality
Source: BMC Pediatr. 2023 Dec 18;23:637. doi: 10.1186/s12887-023-04437-9 (PMC10726606; doi:10.1186/s12887-023-04437-9)
Supplement: Supplementary file 3 — Additional file 3: Supplementary file 3a. Imputed Study Characteristics by Race. Supplementary file 3a. Non-Imputed Study Characteristics by Race. [file 12887_2023_4437_MOESM3_ESM.zip]

Archive with 2 entries (2 files):
- Supplementary File 3a.docx
- Supplementary File 3b.docx
