# Supplementary material for: Development and validation of a pediatric model predicting trauma-related mortality
Source: BMC Pediatr. 2023 Dec 18;23:637. doi: 10.1186/s12887-023-04437-9 (PMC10726606; doi:10.1186/s12887-023-04437-9)
Supplement: Supplementary file 5 — Additional file 5: Supplementary file 5a. Temporal Study Characteristics by Race. Supplementary file 5b. Temporal Study Characteristics by Death [file 12887_2023_4437_MOESM5_ESM.zip]

Archive with 2 entries (2 files):
- Supplementary File 5a.docx
- Supplementary File 5b.docx
